# Supplementary material
Source: PubMed Central journal article supplement (PMC2268216)

# Supp. Fig 1. Ignore Speech-Ignore Rotated

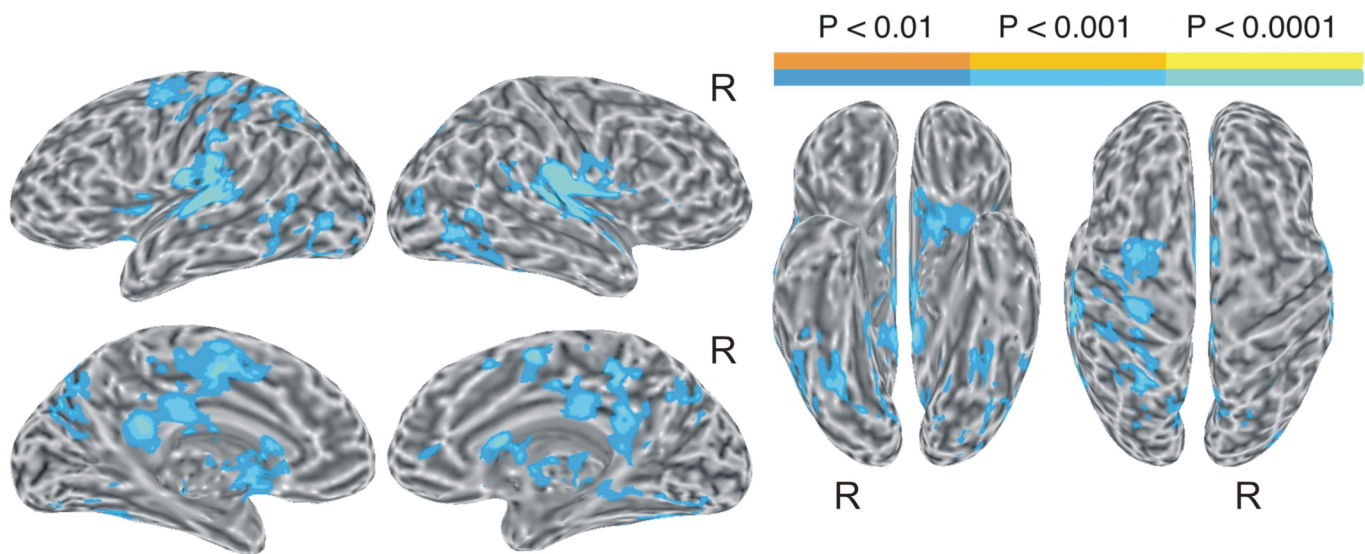

# Supp. Fig 2. Attend Word-Attend Pseudo

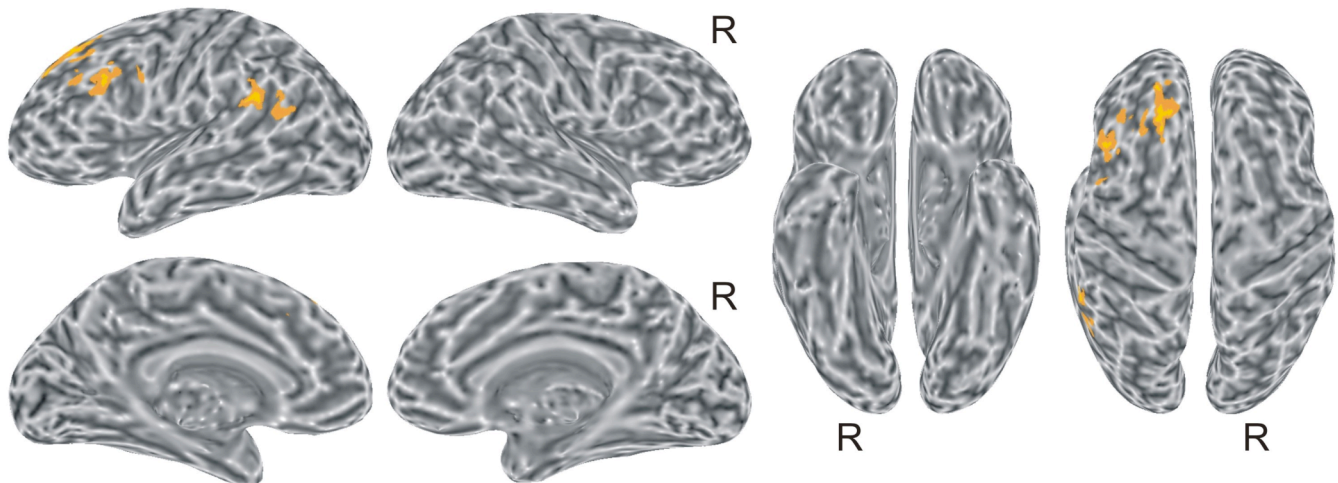

# Supp. Fig 3. Ignore Word-Ignore Pseudo

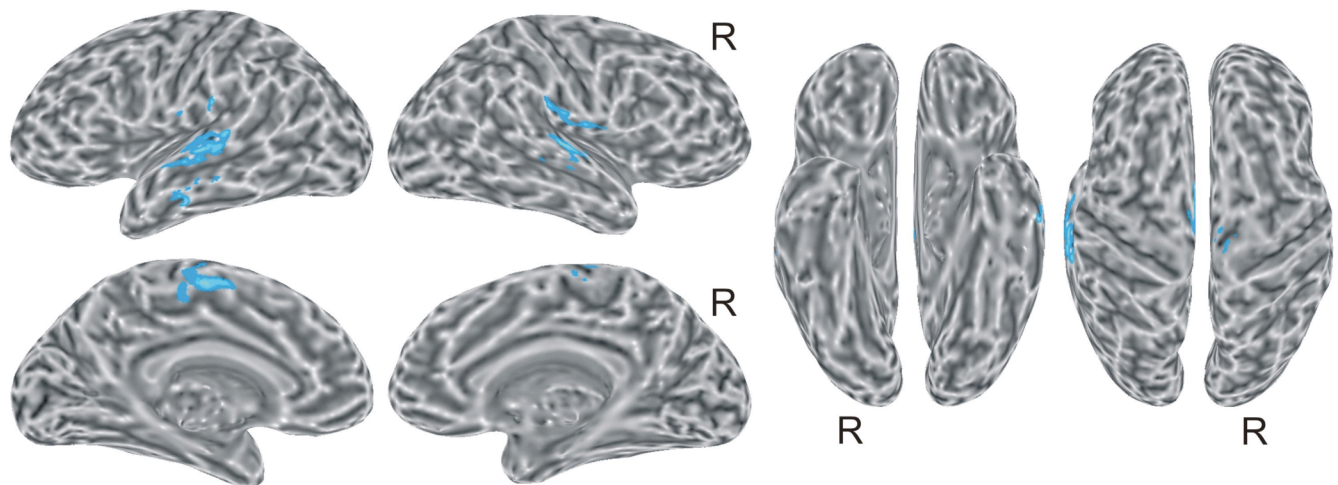

Supplement: NIHMS39238-supplement-01.pdf [file NIHMS39238-supplement-01.pdf]
